# 1 Humans dynamically optimize 2 walking speed to save energy and 3 time

4 R. Elizabeth Carlisle<sup>1\*</sup> and Arthur D. Kuo<sup>1\*,2</sup>

\*For correspondence:

[rebecca.carlisle@ucalgary.ca](mailto:rebecca.carlisle@ucalgary.ca) (REC);  
[arthurdkuo@gmail.com](mailto:arthurdkuo@gmail.com) (ADK)

5 <sup>1</sup>Biomedical Engineering Program; <sup>2</sup>Faculty of Kinesiology, University of Calgary,  
6 Alberta, Canada

7 

---

8 **Abstract** Humans make a number of choices when they walk, such as how fast and for how  
9 long. The preferred steady walking speed seems chosen to minimize energy expenditure per  
10 distance traveled. But the speed of actual walking bouts is not only steady, but rather a  
11 time-varying trajectory, which can also be modulated by task urgency or an individual's  
12 movement vigor. Here we show that speed trajectories and durations of human walking bouts  
13 are explained better by an objective to minimize Energy and Time, meaning the total work or  
14 energy to reach destination, plus a cost proportional to bout duration. Applied to a  
15 computational model of walking dynamics, this objective predicts speed vs. time trajectories with  
16 inverted U shapes. Model and human experiment ( $N = 10$ ) show that shorter bouts are unsteady  
17 and dominated by the time and effort of accelerating, and longer ones are steadier and faster  
18 due to energy-per-distance. Individual-dependent vigor is characterized by the energy one is  
19 willing to spend to save a unit of time, which explains why some may walk faster than others, but  
20 everyone has similar-shaped trajectories due to similar walking dynamics. Tradeoffs between  
21 energy and time costs predict transient, steady, and vigor-related aspects of walking.

22 

---

## 23 Introduction

24 Many aspects of human walking are determined by minimization of metabolic energy expenditure.  
25 For example, the preferred step length (*Atzler and Herbst, 1927*) and step width (*Donelan et al.,*  
26 *2001*) minimize energy expenditure for a given steady speed, and the preferred steady speed ap-  
27 proximately coincides with minimum energy expenditure per distance traveled (Fig. 1A, *Ralston,*  
28 *1958*). This speed, as well as the economy of walking, both decline with age, disability, or poor  
29 health. As such, preferred speed is widely employed as a clinically useful indicator of overall mobil-  
30 ity (*Afilalo et al., 2010; Studenski et al., 2011*). However, there are naturally many other factors that  
31 also influence walking. All walking tasks have a beginning and end, and some may spend little or no  
32 time at steady speed. Some tasks may also occur with a degree of urgency, and some individuals  
33 may habitually walk faster than others, for reasons not obviously explained by economy. Energy  
34 economy is a powerful and objective explanation for steady walking speed, but it does not readily  
35 accommodate these everyday observations. Realistic walking tasks must therefore be governed  
36 by more than energy economy alone.

37 The specific energy measure thought to govern steady walking speed is the gross metabolic  
38 cost of transport (COT). Defined as energy expended per distance travelled and body weight (or  
39 mass), it has a convex dependency on speed. Its minimum (termed min-COT here) seems to predict  
40 the steady preferred speed, as reported extensively in the literature (*Ralston, 1976; Martin et al.,*

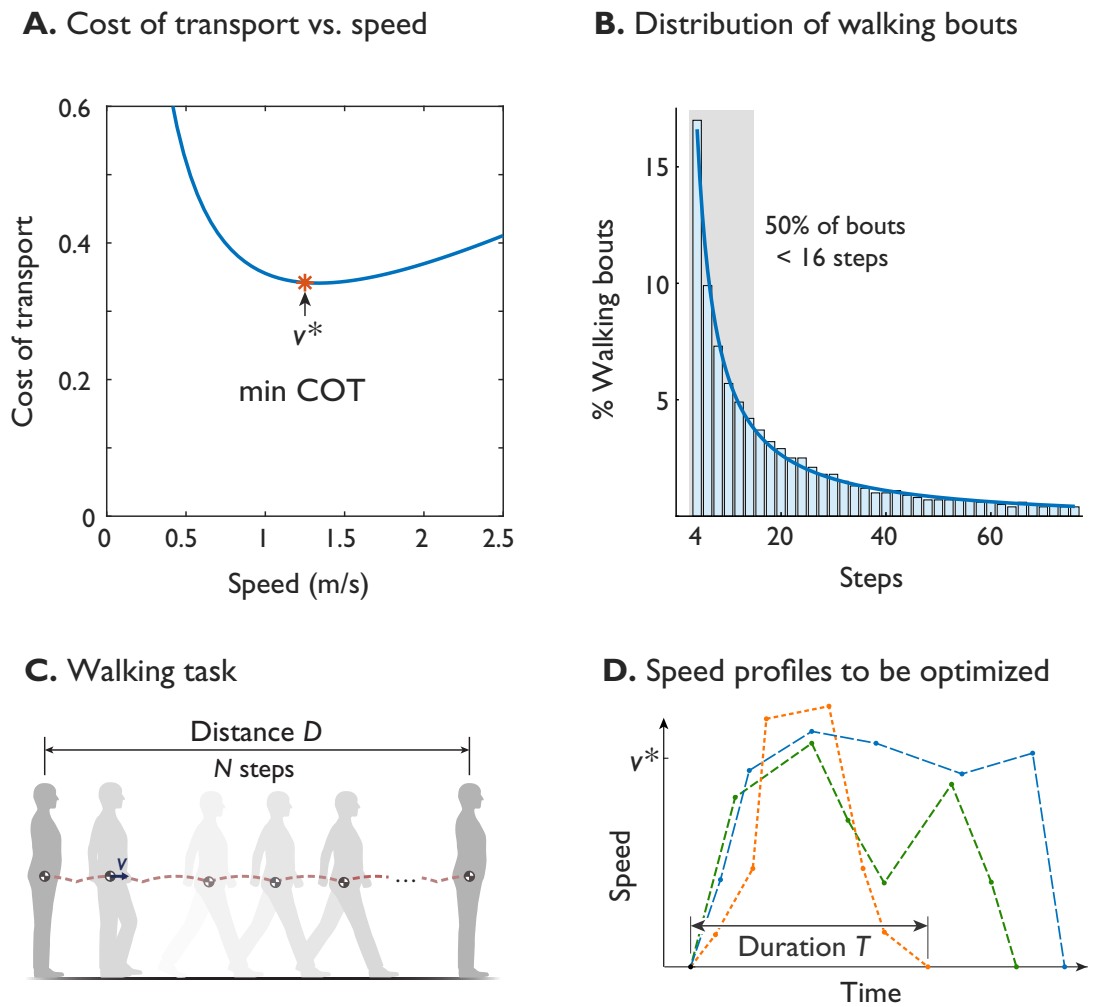

**Figure 1.** Humans prefer an economical speed for steady walking, but not all walking is steady. (A.) The preferred steady walking speed  $v^*$  coincides with minimum metabolic cost of transport (“min COT”), which has a convex dependence on speed (after *Ralston, 1958*). (B.) The distribution of human walking bouts during daily living, plotted as percentage of observed bouts vs. number of steps (in bins of  $\pm 1$ ), as reported by *Orendurff et al. (2008)*. About 50% of bouts were less than 16 steps (shaded area), observed from ten adults over fourteen days. (C.) A typical walking task is to walk a given distance  $D$ , starting and ending at rest. (D.) Walking speed is therefore expected to be a trajectory that starts and ends at zero, potentially differs from steady  $v^*$ , and has a finite duration  $T$ . Hypothetical trajectories are shown as dashed lines.

41 *1992; Willis et al., 2005; Browning and Kram, 2005; Browning et al., 2006; Rose et al., 2006; Entin*  
 42 *et al., 2010*). The same appears to be true for horses and other animals (*Hoyt and Taylor, 1981*).  
 43 However, much of daily living also involves relatively short bouts of walking (Fig. 1B), with about  
 44 half of daily bouts taking less than 16 steps as reported by *Orendurff et al. (2008)*. Such bouts, say  
 45 of distance  $D$  (Fig. 1C), may spend substantial time and energy on starting from and stopping at  
 46 rest, and relatively little time at steady speed. For example, in short bouts of walking up to about a  
 47 dozen steps, peak speed is slower than the steady optimum, and only attains that value with more  
 48 steps (*Seethapathi and Srinivasan, 2015*). There is a substantial energetic cost to changing speeds  
 49 that could account for 4-8% of daily walking energy budget (*Seethapathi and Srinivasan, 2015*). If  
 50 energy economy is important for walking, it should apply to an entire walking bout or task, and not  
 51 only to steady speed.

52 Another important factor for walking is time. Time is valuable in part because energy is always  
 53 expended even when one is at rest (*Jetté et al., 1990*), and because walking faster can save time

54 to reach destination, but at greater energy cost (*Ralston, 1958*). Time is also subjectively valuable,  
55 because the urgency of a task, or even of an individual's personality, surroundings, or culture, could  
56 influence their speed. It has long been observed that people walk faster in big cities than in small  
57 towns, by a factor of more than two-fold (about  $0.75 - 1.75 \text{ m s}^{-1}$ ), or about  $\pm 40\%$  of  $1.25 \text{ m s}^{-1}$   
58 (*Bornstein and Bornstein, 1976*). Perhaps population density affects a person's valuation of time  
59 (*Bornstein, 1979; Levine and Bartlett, 1984; Li and Cao, 2019*). Time is certainly a factor in deciding  
60 whether to walk or run (*Summerside et al., 2018*), and is considered an important factor in the  
61 general vigor of movements, beyond walking alone (*Labaune et al., 2019*). It is clearly worthwhile  
62 to expend more energy if time is of essence.

63 There are, however, challenges to incorporating time into walking. One method is to factor  
64 time into the equivalent of temporally discounted reward (*Shadmehr et al., 2010*), which refers  
65 to offering a reduced reward for longer durations, typically employed in fields such as movement  
66 vigor, foraging theory (*Green and Myerson, 1996*), and reinforcement learning (*Sutton and Barto,*  
67 *2018*). Another is to express time as a cost that increases for longer movement durations, trading  
68 off against greater energy cost for shorter durations. Both the energy cost for an entire walking  
69 bout, plus a cost for time duration, could thus be combined into a single objective function to be  
70 minimized (*Wong et al., 2021*). This presents a second challenge, which is how to determine the op-  
71 timum. Unlike the case of steady walking at a single speed (Fig. 1A), an entire walking bout requires  
72 a time-varying trajectory of walking speed. This cannot be determined from the cost of transport  
73 curve, but can potentially be predicted by a quantitative, dynamical model. Simple models of walk-  
74 ing (Fig. 7), based on the pendulum-like dynamics of walking, can predict aspects such as optimal  
75 step length and step width (*Kuo et al., 2005*) for a steady speed, and optimal speed fluctuations  
76 for uneven steps (*Darici et al., 2020*). It remains to be determined whether they can predict the  
77 energetics and timing of walking bouts with transient conditions.

78 The purpose of the present study was to test whether the combined costs of energy and time  
79 can predict dynamic variation in walking speed. We propose a basic quantitative objective function  
80 called the Energy-Time hypothesis, which includes a cost for total energy expenditure or mechan-  
81 ical work for a walking bout, plus a penalty increasing with the bout's time duration. We apply  
82 this objective to a computational walking model, using dynamic optimization to predict dynamic  
83 speed profiles for walking bouts of varying distance (Fig. 1D). For relatively short walking bouts,  
84 this hypothesis predicts speeds that vary within a bout, and speed profiles that vary across bout  
85 distances. For longer distances, it predicts a steady walking speed, not as an explicit outcome but  
86 rather as an emergent behavior. To test these predictions, we performed a human subjects experi-  
87 ment, comparing empirical speed profiles against model predictions. If the model is able to predict  
88 human speed profiles, it may suggest that a valuation of time and energy can influence walking,  
89 and thus be compatible with walking bouts of any distance and any degree of urgency.

## 90 Results

### 91 Model Predictions

92 A simple model of walking dynamics predicts theoretically optimal speed trajectories and walking  
93 bout durations. The Energy-Time hypothesis is that humans perform walking bouts that minimize  
94 an objective including the total energy and time expended for the bout. The dynamic optimization  
95 problem may be summarized as

$$\begin{aligned} & \text{minimize (Energy expenditure) + } C_T \text{(Time duration)} \\ & \text{subject to: starting and ending at rest} \\ & \text{with } N \text{ steps of pendulum-like walking dynamics} \end{aligned}$$

99 where the total metabolic energy expenditure is evaluated for the entire walking task, and the  
100 time duration is weighted by a metabolic energy coefficient  $C_T$  (in units of energy per time). In the  
101 model, positive mechanical work is used as a proportional indicator of human energy expenditure,  
102 with (lower-case) work coefficient  $c_T$ . This coefficient is a valuation of time, and may be interpreted

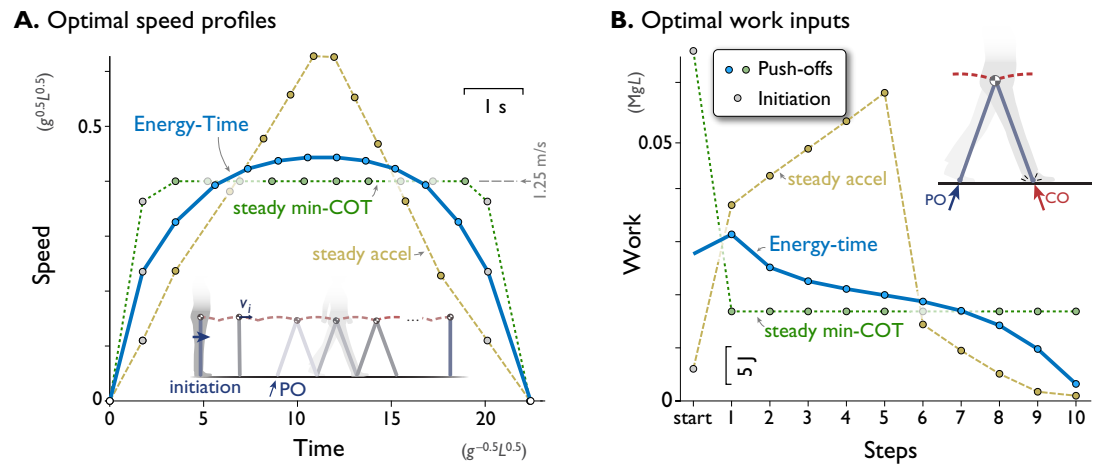

**Figure 2.** A computational model of walking predicts that a rounded speed profile is most economical for a short walking bout of fixed time and distance. (A.) Predicted speed profiles for a walking bout of ten steps, comparing minimization of Energy and Time (Energy-Time, solid line) against maintaining steady speed (min-COT, dotted line) or steady acceleration and deceleration (steady accel, dashed line). Energy-Time minimizes the total push-off (PO) work plus time expended for a walking bout, for a model with pendulum-like legs (inset). Steady min-COT walks at the steady speed that minimizes cost of transport, by accelerating immediately to that speed. Steady acceleration walks with linearly increasing speed until mid-point, then decelerates linearly back to rest. Energy-Time predicts a gently rounded speed profile, min-COT a trapezoidal profile, and steady acceleration a triangular profile. Speeds are sampled once per step (filled dots), starting with an initiation impulse to accelerate from standing and a termination impulse to decelerate at the end (gray dots). (B.) Positive work inputs for each hypothesis, including initiation work (gray dots) and push-off work (colored dots, one per step). Energy-time hypothesis predicts the least total work, whereas steady min-COT and steady acceleration require more overall work. Predictions are for a dynamic walking model with pendulum-like legs (inset, see Methods). All predictions are designed for the same duration based on steady min-COT speed as a reference, resulting in cost of Time  $c_T = 0.020$ . Predictions are plotted in terms of normalized units based on body mass  $M$ , leg length  $L$ , and gravitational acceleration  $g$ ; scale for typical human also shown, mass 70 kg, leg length 1 m.

103 as the energy or work one is willing to expend to save a unit of time. The overall objective is to  
 104 be minimized with an appropriate trajectory of the body's speed, which is the outcome of the  
 105 human's active control actions. The optimal control actions are subject to constraints, namely  
 106 the specified distance of a walking bout and the governing walking dynamics (see Methods for  
 107 details). Walking dynamics refers to the dynamics of the body, where the stance leg behaves like  
 108 an inverted pendulum and the swing leg like a swinging pendulum. These dynamics also describe  
 109 the mechanical work and energy associated with a speed trajectory, and how long each step takes.  
 110 The time duration  $T$  of a bout is the outcome of the optimization, where greater valuation of time  
 111  $C_T$  favors shorter duration.

112 The optimization predicts the speed profiles for a representative, ten-step task (Fig. 2A). To  
 113 focus on Energy first, the duration is kept fixed here. The Energy-Time objective (predicts a gradual  
 114 increase in speed, with a gently rounded profile that peaks mid-way through the bout. For this  
 115 relatively short distance, little or no time is spent at steady speed. This contrasts with two other  
 116 possibilities, to maintain steady speed at min-COT, or to maintain steady acceleration. The steady  
 117 min-COT objective produces a speed profile resembling a trapezoid, accelerating immediately to  
 118 attain steady speed, maintained throughout the bout, before terminating just as quickly. Steady  
 119 acceleration causes speed to increase linearly over time until peaking mid-bout, followed by a linear  
 120 decrease back to rest. Here, all three alternatives are directed to walk the same distance in the  
 121 same time, but at different costs.

122 Examination of the positive work inputs reveals why Energy-Time is least costly (Fig. 2B). Its gen-  
 123 tle acceleration requires moderate push-offs, which trail off over time as the model nearly coasts

124 to a stop at destination, taking advantage of each step's collision loss to reduce speed at little cost.  
 125 In contrast, the steady min-COT objective pays a high cost to initiate gait, and then a moderate and  
 126 constant amount of work for all push-offs. It does not take advantage of coasting to a stop, and is  
 127 ultimately about 13% more costly than Energy-Time. Steady acceleration pays a high cost to peak  
 128 at a high speed, which is not made up for by greatly reduced push-offs as it comes to a stop. Some  
 129 intuition may be gained by considering the analogous situation of a vehicle driving a short fixed  
 130 distance between two stop signs, in fixed time. It is generally economical to accelerate and decel-  
 131 erate gradually, and not necessarily maintain steady speed except beyond a certain distance. A  
 132 trapezoidal (min-COT) speed profile is not recommended, because considerable energy is spent in  
 133 fast acceleration, and braking maximally at the end is more wasteful than lifting off the accelerator  
 134 early and coasting. A triangular (steady acceleration) profile is also not recommended, due to the  
 135 work needed to briefly attain a high speed. Of course, walking and driving have different dynamics,  
 136 but both have similar energetic loss rates that increase approximately with the cube of speed. The  
 137 higher losses incurred at greater speeds is an important reason for the Energy-time optimality of a  
 138 rounded speed profile.

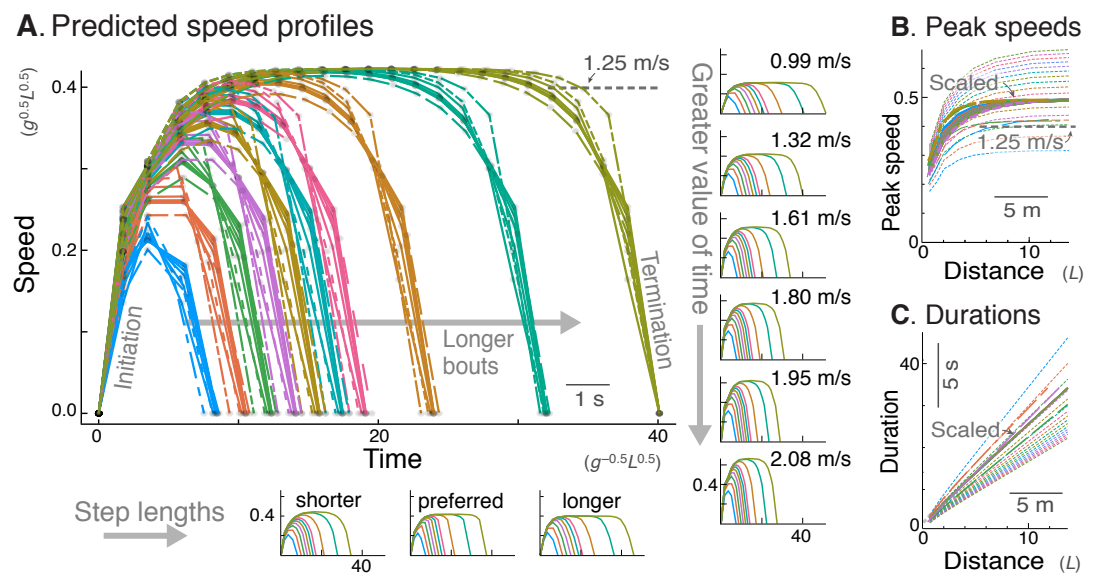

**Figure 3.** Energy-Time hypothesis predicts a family of speed profiles. (A.) Predicted speed profiles vs. time for a range of walking distances, time valuations, and step lengths. In main plot, multiple predictions are scaled and superimposed on each other to emphasize self-similarity. Original, unscaled traces are shown in surrounding insets. (Horizontal insets, bottom:) Three different step lengths, including shorter (0.59 m), longer (0.79 m), and human preferred step length relationship. (Vertical insets, right:) Varying valuation of time  $c_T$  results in two-fold variation in peak speeds (labeled) and walk durations. The time cost and step length therefore affect only how quickly the task is completed, and not the shape of the family of speed profiles. (B.) Peak speeds are predicted to increase sharply with distance, approaching an asymptote for distances of about 12 m or more. Again, despite different peak speeds, the curves are self-similar and can be scaled to a single shape (thick lines). (C.) Walking durations increase with distance, with slightly curvilinear relationship (also scaled to a single shape, thick lines). In (A.), time cost  $c_T$  is varied between 0.006 and 0.06 (in units of  $Mg^{1.5}L^{0.5}$ ), and distances range from 2 to 20 steps. Model predictions are plotted in dimensionless units, using body mass  $M$ , leg length  $L$ , and gravitational acceleration  $g$  as base units; scale for typical human also shown, mass 70 kg, leg length 1 m.

139 Having established the energetic advantages of the Energy-Time hypothesis, we next examine  
 140 how the optimal speed profiles vary with Time and other model parameters (Fig. 3). Here there  
 141 are three parameters of interest: the value of time  $c_T$ , step length, and walking bout distance.  
 142 We considered step lengths  $s$  fixed at nominal (0.68 m), at a slightly longer length (0.78 m), and  
 143 increasing with speed according to the human preferred step length relationship (see Methods for

144 details). We also considered bouts of one to twenty steps, or about 0.68 m to 13.7 m, as well as  
145 time valuations  $c_T$  ranging ten-fold, 0.006 to 0.06 (dimensionless). Examining many combinations  
146 of these parameters, a few characteristics emerge. The speed profiles generally retain a gently  
147 rounded profile (Fig. 3A), smoothly accelerating from rest and leveling off at a peak speed before  
148 decelerating back to rest. Unlike the trapezoidal profile, the speed profiles are always peaked,  
149 particularly for short bouts. The longer the distance, the more evident a middle section of steady  
150 speed, and the shorter the distance, the more rounded the speed profile. The acceleration and  
151 deceleration slopes increase slightly with longer bouts, and only for distances of about 10 m or  
152 more is there a steady gait near peak speed. The peak speed also initially increases sharply with  
153 walking distance (Fig. 3B), but then approaches an asymptote for greater distances, as the cost of  
154 acceleration and deceleration becomes inconsequential to overall cost  $J$ . In fact, the asymptotic  
155 peak speed for long walks is a steady speed, not unlike the minimum-COT speed. But for finite  
156 walk distances, the speed profile generally does not agree with the steady min-COT hypothesis,  
157 because it varies dynamically within a bout of walking, and across different bout distances.

158 Another feature of the Energy-Time prediction is consistency with respect to parameter values  
159 (Fig. 3A). The main free parameter is the time valuation  $c_T$ , for which higher values call for higher  
160 peak speeds, and therefore shorter walking durations. But with peak speeds ranging more than  
161 two-fold (Fig. 3A, inset), the speed profiles all had similar shape. In fact, scaling each of the profiles  
162 in time and amplitude yielded a very similar family of trajectories regardless of parameter values  
163 (Fig. 3A). This is also the case for variation in step length, with nominal, long, and preferred hu-  
164 man step lengths all producing similar trajectories. Similarly, the peak speed vs. distance curves  
165 resembled a saturating exponential regardless of parameter values (Fig. 3B), and these were also  
166 scalable in amplitude to yield a single family of curves. Walking durations vs. distance (Fig. 3C),  
167 also had similar, scalable and curvilinear shape for all parameters. Similar profiles are produced  
168 regardless of whether the model takes step lengths that are fixed, or that scale according to the  
169 empirical step length vs. walking speed relationship for steady walking (insets, Fig. 3A). We there-  
170 fore subsequently keep step length fixed (equivalent of 0.68 m for human) for simplicity. As a result,  
171 the time cost coefficient  $c_T$  is effectively the model's sole free parameter, and the predicted speed  
172 profile shapes scale very consistently with respect to that parameter.

173 There are thus three main predictions from the model that can be tested in human. First, the  
174 speed profiles should fall within a single consistent family, which includes more rounded shapes for  
175 short walks, and flatter for longer walks (Fig. 3A). These profiles should exhibit self-similarity, and  
176 be scalable in peak speed and time to resemble a single, relatively uniform family of profiles. Sec-  
177 ond, the peak speed should increase with distance, with an approximately exponential saturation  
178 toward an asymptote (Fig. 3B). Again, that relationship is expected to be scalable by peak speed,  
179 and testable by a single saturating exponential. And third, walking durations should increase with  
180 distance, in a slightly curvilinear relationship (Fig. 3C) approaching a straight-line asymptote for  
181 longer distances. For shorter distances, substantial time should be spent accelerating and decel-  
182 erating, compared to relatively brief cruising periods. We thus treat the time valuation  $c_T$  as an  
183 empirical parameter that mainly affects the scale, but not the shape of the speed profiles and  
184 dependency on distance.

## 185 **Experimental Results**

186 The human speed profiles for all trials and all distances were found to exhibit consistent profiles  
187 between subjects and between individual trials (Fig. 4). These profiles resembled predictions from  
188 the Energy-Time hypothesis. Qualitatively, humans produced inverted U profiles similar to model,  
189 with sharper and lower peak speeds for shorter bouts. Longer bouts had higher and flatter peaks,  
190 where a steady speed could be discerned. Each individual subject walked at a somewhat different  
191 speed and for a somewhat different time (Fig. 4A). For example, the range of peak speeds across  
192 subjects, observed for the longest (12.7 m) bout, was 1.21 to 1.78  $\text{m s}^{-1}$ , and the corresponding  
193 range of durations was 8.51 to 11.86 s. Nevertheless, the profile shapes were all quite similar across

194 subjects. In contrast, the speed trajectories did not resemble the trapezoidal profiles expected  
195 from the Steady min-COT hypothesis.

### A. Speed vs. time

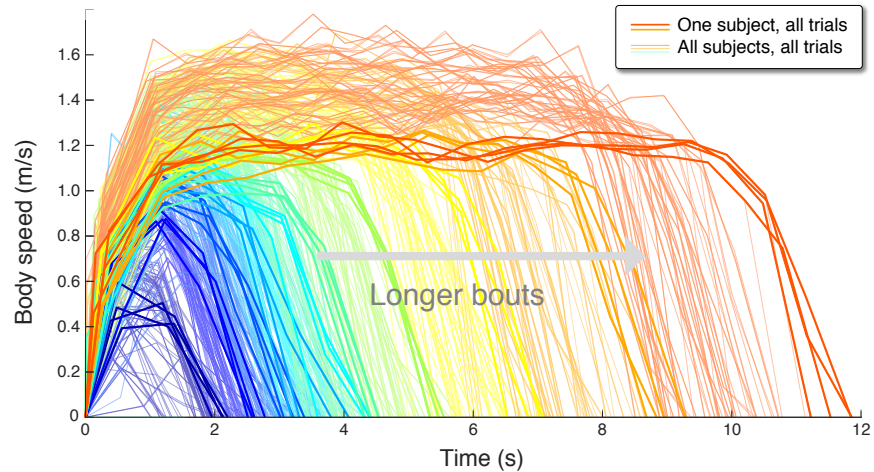

### B. Speed vs. time, normalized

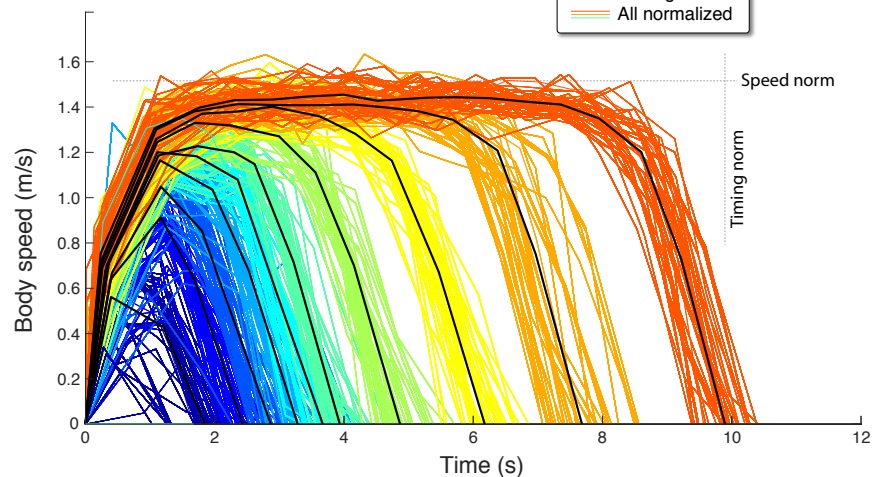

**Figure 4.** Human speed profiles vs. time for (A.) all subjects ( $N = 10$ ), and (B.) all subjects normalized to the average. Body speeds are plotted for all ten walking bout distances (colored lines). In (A.), one representative subject is highlighted (thicker lines) to show a typical person's variability between trials. In (B.), all traces for each subject are normalized by that person's average peak speed ("Speed norm") for the longest distance, and by their average time for that bout ("Timing norm"). Also shown are the mean walking bouts across subjects (thick black lines,  $N = 10$ ) for each distance, to illustrate how different subjects resemble each other despite varying in how fast they walk. Averages were computed by resampling each trial to the most common step count for each distance, averaging across such profiles for each distance, and then rescaling time to reflect the average duration for each distance.

196 The experimental speed trajectories were scalable in speed and time, to yield a self-similar fam-  
197 ily of trajectories (Fig. 4B). Each individual's trajectories were normalized in time by the duration  
198 for that subject's longest bout, and in speed by the maximum speed of their longest bout. These  
199 were then re-scaled to match the average duration and peak speed across subjects, to yield a nor-  
200 malized set of speed profiles for all subjects (Fig. 4B). The resulting normalized trajectories reveals  
201 considerable similarity between individuals, with a single, relatively uniform family of profiles for  
202 all subjects. Thus, the peak speed and duration of a walking bout of 2 m was consistently related  
203 to one of 12 m, and vice versa.

204 This scalability may be quantified in terms of peak speeds and durations. Examining the peak

205 speed for each distance reveals a consistent pattern (Fig. 5A). Peak speeds increased with distance,  
206 sharply for short distances and then saturating for longer distances. The overall pattern resem-  
207 bled a saturating exponential, similar to model predictions. The overall maximum speed was  $1.52$   
208  $\pm 0.14 \text{ m s}^{-1}$  (mean  $\pm$  s.d. across subjects), almost always for the longest distance. We normalized  
209 each individual's peak speed by their own maximum, and found the resulting peak speed vs. dis-  
210 tance curves to be scalable into a single normalized curve across subjects. With normalization, the  
211 variability (s.d. across individuals) of peak speeds was reduced significantly ( $P = 1.6 \times 10^{-6}$ ), by  
212  $0.07 \pm 0.02 \text{ m s}^{-1}$  (mean  $\pm$  s.d.) across all bout distances or about 54% compared to un-normalized.  
213 Thus, even though each individual walked at their own pace, that tendency was consistent across  
214 all distances. Much of the inter-subject variability was reduced by normalizing the peak speeds,  
215 revealing a common relationship between peak speed and bout distance.

216 There was a similarly consistent pattern for walking durations across distances (Fig. 5B). Walk-  
217 ing durations increased with distance in a slightly curvilinear fashion. Again, we normalized each  
218 individual's durations by the duration for the longest bout ( $9.86 \pm 0.75 \text{ s}$ ), and found the duration  
219 vs. distances to be scalable into a single normalized curve across subjects. With normalization,  
220 the variability of durations was also reduced significantly ( $P = 0.03$ ), by  $0.10 \pm 0.13 \text{ s}$  across all bout  
221 distances, or about 18% compared to un-normalized. Similar to peak speeds, much of the inter-  
222 subject variability was reduced by normalizing. There was a common and consistent relationship  
223 between different walking bouts, similar to model predictions.

224 The change in peakiness or flatness of speed profiles was indicated by the time spent accelerat-  
225 ing, decelerating, or at approximately constant speed (Fig. 5B). Rise time is defined as the time to  
226 accelerate from 0% to 90% of peak speed, cruise time as the time spent 90% of peak speed or more,  
227 and fall time as the time to decelerate between 90% and 0% of peak speed (Fig. 5B). These mea-  
228 sures of time increased with bout distance. As a fraction of each bout's duration, the rise and fall  
229 times appeared to take up a greater proportion for shorter bouts, and only a very small proportion  
230 was spent at steady speed. Conversely, cruise time took up a greater proportion of the time for  
231 longer bouts. These behaviors were consistent with predictions from the Energy-Time hypothesis.

232 The peak speed was described reasonably well by a saturating exponential (Fig. 5A). A least-  
233 squares nonlinear fit to the normalized data yielded a saturating exponential curve

$$v(D) = c_v(1 - e^{-D/d_v}) \quad (1)$$

234 where  $v(D)$  is the peak speed as a function of total walking distance  $D$ , and fitted values were  
235  $c_v = 1.516 \text{ m s}^{-1}$  (1.496, 1.536 CI, 95% confidence interval) and  $d_v = 1.877 \text{ m}$  (1.798, 1.955 CI), for a  
236 statistically significant fit ( $P < 0.05$ ) with  $R^2 = 0.86$ . The curve fit shows that there was considerable  
237 consistency in maximum speed; even short walking bouts of slow peak speed were still consistent  
238 with longer bouts of higher speed.

239 Similarly, walking duration increased with walking distance (Fig. 5B), with a slightly curvilinear  
240 relationship. The total walk duration  $T(D)$  may be treated as a saturating exponential approaching  
241 a straight asymptote, equal to distance  $D$  divided by preferred steady walking speed plus an offset  
242  $T_0$ . The curve was of the form

$$T(D) = \frac{D}{v_T} + T_0(1 - e^{-D/d_T}). \quad (2)$$

243 where fitted coefficients were  $v_T = 1.494 \text{ m s}^{-1}$  (1.466, 1.521 CI),  $T_0 = 1.470 \text{ s}$  (1.375, 1.565 CI), and  
244  $d_T = 0.790 \text{ m}$  (0.610, 0.970 CI).

245 We also performed similar analyses on a grass walking surface to test for sensitivity to slightly  
246 uneven terrain. An identical set of conditions was collected on short grass outdoors. The fit of peak  
247 speed vs. bout distance yielded  $c_v = 1.446 \text{ m s}^{-1}$ ,  $d_v = 1.822 \text{ m s}^{-1}$  ( $R^2 = 0.85$ ), and for duration versus  
248 distance  $v_T = 1.426 \text{ m s}^{-1}$ ,  $T_0 = 1.336 \text{ s}$ , and  $d_T = 0.503 \text{ m}$  ( $R^2 = 0.98$ ). These relationships were quite  
249 similar to those obtained on sidewalk.

250 We next estimated the relationship between human valuation of time and steady walking speed  
251 (Fig. 6). Here, the empirical human metabolic power curve increasing with speed (Fig. 6A), was used



**A. Peak speed vs. distance**

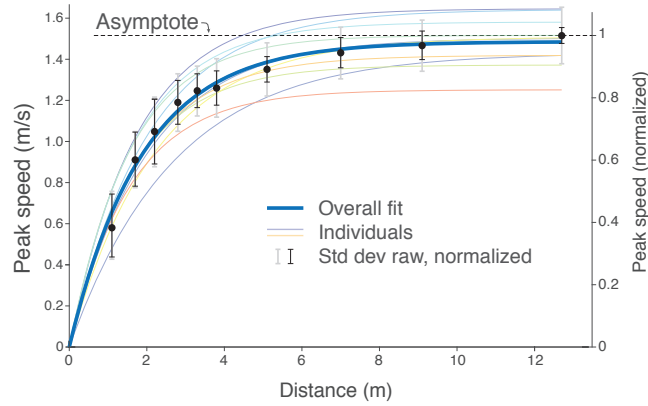

**B. Walking duration vs. distance**

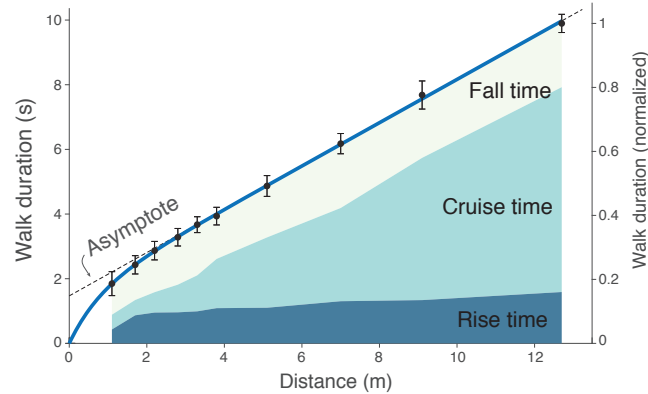

**Figure 5.** Human walking bouts show increases in (A.) peak speed and (B.) walking duration vs. distance. (A.) Peak speeds are shown for each walking distance, averaged across subjects (filled symbols,  $N = 10$ ). A saturating exponential fit is shown for each subject (thin lines), as well as for overall data (thick solid line,  $R^2 = 0.86$ ). Variability in peak speeds is shown between all trials (standard deviation, gray error bars), and after normalization of peak speed (thin black error bars), showing reduced variability in normalized speeds. (B.) Walking durations are shown (after normalization for duration of longest bout) for each walking distance, along with a saturating exponential fit ( $R^2 = 0.98$ ). Shaded areas denote rise time (0% to 90% of peak speed), cruise time (90% of peak and greater), and fall time (90% to 0%). Rise and fall times appear to dominate shorter walking bouts, and cruise time for longer walking bouts. Filled black dots denote mean data, error bars denote s.d. The entire range of unnormalized peak speeds and durations for all subjects is shown in Fig. 4.

252 to predict how steady walking speed should increase with metabolic value of time  $C_T$  (Fig. 6B), and  
 253 how the energetic cost of transport vs. steady walking speed (Fig. 6C) may be regarded in terms of  
 254 competing costs for Energy and Time. This was accomplished by fitting the human power curve to  
 255 the model, to facilitate scaling the model's mechanical energy into human metabolic energy. The  
 256 optimal steady walking speed emerges from that curve (Srinivasan, 2009), as a function of  $C_T$  (Fig.  
 257 6A). A time valuation of zero yields the same optimal speed  $v^*$  of  $1.25 \text{ m s}^{-1}$  as min COT, and close  
 258 to the minimum steady speed (among subjects) of  $1.21 \text{ m s}^{-1}$  observed here. It is instructive to  
 259 increment  $C_T$  by multiples of the metabolic equivalent (MET), a standard physiological resting rate  
 260 of about  $1.23 \text{ W kg}^{-1}$  (Jetté et al., 1990). An increment of 1 or 2 MET yields optimal speeds of  $1.54$   
 261  $\text{m s}^{-1}$  or  $1.75 \text{ m s}^{-1}$ , respectively, quite close to the observed mean and maximum steady speeds  
 262 (among subjects), respectively (of  $1.52 \text{ m s}^{-1}$  and  $1.75 \text{ m s}^{-1}$ ). Thus, if the same metabolic power  
 263 curve were applicable to all, the slowest subject would have valued time at about zero MET, the  
 264 mean subject at +1 MET, and the fastest at +2 MET. This also suggests that most subjects preferred  
 265 faster steady speeds than min-COT. Examining the continuous relationship between the two (Fig.

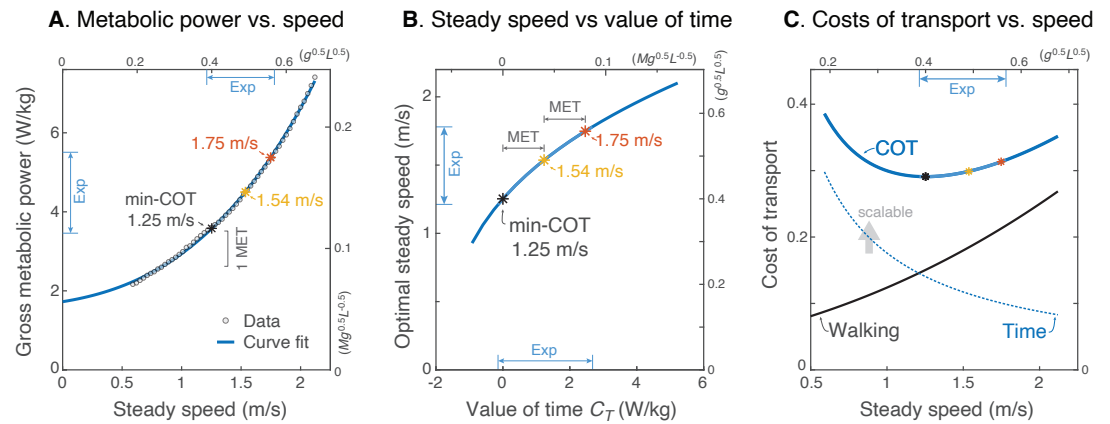

**Figure 6.** Prediction of steady walking speed emerges from Energy-Time hypothesis. (A.) Human metabolic power vs. speed for steady walking (adapted from *Elftman, 1966*), along with a model-based curve fit ( $R^2 = 0.999$ ; see Eq. 15). Faster walking can be produced by valuing time more, with metabolic  $C_T = 1$  MET yielding  $1.54 \text{ m s}^{-1}$  and  $2$  MET yielding  $1.75 \text{ m s}^{-1}$ . (MET is metabolic resting rate, serving as a standard reference value.) (B.) Model steady speed vs. value of time  $C_T$  increases such that each increment of  $C_T$  in model yields a diminishing increase in speed, due to the increasingly high energetic cost of walking faster. Walking speeds observed in experiment (“Exp” range) may be interpreted as human  $C_T$  ranging from about 0 – 2 MET above resting. (C.) Model energetic cost of transport (COT) may be regarded as the sum of two competing costs: a physiological cost for Walking and a scalable, virtual cost for the Time expended. Steady walking speed is optimized where the two costs have equal and opposite slope. As the valuation of time  $C_T$  increases, preferred steady speed increases. The valuation of time is a virtual cost, and does not affect the human’s actual energy expenditure curve. Rather, valuation  $C_T$  represents how much metabolic energy an individual is willing to spend to save a unit of time. The three marked speeds (asterisks ‘\*’) are for a gross valuation of time starting at a resting rate, and incremented by one or two MET.

266 6B), there are diminishing returns in speed to incrementing  $C_T$ , because it is increasingly costly to  
 267 walk faster. One interpretation afforded by the Energy-Time hypothesis is that there is an effective  
 268 cost of transport that may be separated into two terms (6C), Walking and Time): one for the net  
 269 metabolic cost for walking alone (due to push-off work), the other a cost of time that lumps the  
 270 resting rate together with  $C_T$ . This reveals a trade-off, where the cost of walking increases with  
 271 speed, and the cost of time decreases (hyperbolically with speed), such that the two opposing  
 272 curves (or rather their opposing slopes) determine an optimum. A greater valuation of time adds  
 273 to this effective cost of transport, equal to the actual metabolic energy plus the virtual cost of time,  
 274 per distance traveled. This shows how the effective Energy-Time cost per distance is minimized at  
 275 higher speeds for greater  $C_T$ .

## 276 Discussion

277 We had sought to test whether humans optimize not only metabolic energy but also a valuation  
 278 of time spent walking. Although the prevailing theory of minimizing the energetic COT explains  
 279 steady walking, it does not explain shorter walks that lack a steady speed, nor does it readily ac-  
 280 commodate individual tendencies toward faster or slower speeds. We found that humans walk  
 281 bouts of finite distance with a trajectory of speeds varying with distance. These bouts fall within a  
 282 consistent family of trajectories across subjects, despite individual differences in overall speed or  
 283 duration. These results are in agreement with a simple mechanistic model of walking, governed  
 284 by optimization. The findings suggest that humans optimize a combined objective that trades off  
 285 the energy to arrive at destination against the time it takes to get there.

286 Each walking bout consisted of a dynamically varying trajectory of speed with an inverted U  
 287 shape. Many of these bouts included a period of steady walking, at speed similar to min-COT  
 288 (*Ralston, 1958*), but mainly for the longer distances (Fig. 4). Bouts of say 10 m or less exhibited a  
 289 relatively brief peak slower than the typical min-COT speed (Fig. 5B). Short distances such as this are

290 quite common, and account for about half of the daily living walking bouts reported by *Orendurff*  
291 *et al.* (2008). All such bouts spend substantial time and energy in acceleration and deceleration (Fig.  
292 5B), which could account for 4-8% of daily walking energy budget (*Seethapathi and Srinivasan,*  
293 *2015*). We also consider finite walking bouts to be ecological, because people usually walk to a  
294 destination of known distance. It is more sensible to minimize the total energy for that distance,  
295 as opposed to the energy per distance. This is not to dismiss the energy spent for steady walking,  
296 but to recognize that considerable time and energy are spent for accelerating, decelerating, or  
297 walking relatively short and known distances.

298 Even though there were considerable differences between individuals, each subject was quite  
299 consistent within their own walking bouts. Those with a slower or faster peak speed during longer  
300 bouts were also consistently so during shorter, non-steady bouts (Fig. 5), as evidenced by the 54%  
301 reduced variability after normalizing peak speeds by the longest bout. Moreover, the bouts across  
302 all subjects were scalable to a single, self-similar family of trajectories (Fig. 4). These trajectories  
303 were not consistent with a fixed acceleration or deceleration profile (Fig. 2A), and instead exhibited  
304 a greater peak speed and longer time to that peak with greater distance (Fig. 4B). This pattern sug-  
305 gests that there are systematic criteria or principles that govern walking bouts of finite distance.  
306 Even though some individuals are faster than others (Fig. 4A), they all seem to follow similar prin-  
307 ciples.

308 These observations agree with the primary hypothesis that humans optimize for energy and  
309 time. A key aspect of this hypothesis is that given a fixed bout distance, the entire speed trajectory  
310 including accelerating, decelerating, and steady walking (if any), is specified by optimization. Mini-  
311 mizing the total cost per walking bout contrasts with minimizing the cost per distance (COT), which  
312 considers only steady walking of unspecified distance and duration. The proposed model not only  
313 predicts the human speed trajectories, but also their scalability to a single family of trajectories  
314 (Fig. 3), despite individual-specific step lengths and time valuations. The model suggests how peak  
315 speeds, and time to peak, and durations should increase with distance (Fig. 3, similar to human  
316 data. The primary free parameter is the individual-specific valuation of time ( $c_T$  in terms of model  
317 work,  $C_T$  in terms of human metabolic cost). That valuation may depend on complex physiological  
318 and socio-psychological traits, but it nonetheless appears to have predictive value for a given con-  
319 text. Not tested here is the presumption that different contexts, for example changing the saliency  
320 of a task or adding time pressure, will also lead to systematic changes in walking bouts. If an in-  
321 dividual's valuation of time can be estimated empirically, our hypothesis provides an operational  
322 means of integrating it into a quantitative model.

323 These predictions are produced by a mechanistic model governed almost entirely by dynamics.  
324 The timing comes from the dynamics of pendulum-like walking, and the energetics from the step-  
325 to-step transition between pendulum-like steps. The step-to-step transition requires mechanical  
326 work to accelerate and to restore collision losses, such that for short walks it is uneconomical both  
327 to accelerate quickly to min-COT speed and to maintain that speed (Fig. 2). The model favors accel-  
328 erating more gently to a slower and continuously varying speed with an inverted U shape. Separate  
329 studies have found step-to-step transition work to predict human metabolic energy expenditure  
330 as a function of step length (*Donelan et al., 2002*) and changing speed (*Seethapathi and Srinivasan,*  
331 *2015*). Here we have constrained the pendulum-like dynamics so that there is only one free phys-  
332 ical parameter, step length, which in any case has very little effect on the characteristic shape of  
333 speed trajectories (Fig. 3). As such, there are no opportunities to fit the model to data, making it  
334 truly predictive. Of course, the human body has many degrees of freedom capable of far different  
335 motions, but model analysis suggests that pendulum-like walking is the most economical means to  
336 move the COM at slow to moderate speeds (*Srinivasan and Ruina, 2006*), and that push-off during  
337 the step-to-step transition is the most economical means of powering such pendulum-like walking  
338 (*Kuo, 2001*). These models are predicated on mechanical work as the major cost, and the COM as  
339 the major inertia in the system. We did not explore more complex models here, but would expect  
340 similar predictions to result if similar principles of work and energetic cost apply.

341 This model is optimized with an additional control parameter, for the valuation of time. Time  
342 has long been recognized as a factor in the pace of life (*Levine and Bartlett, 1984*), and in reward  
343 and vigor in motor control (*Shadmehr et al., 2010*). It is typically expressed as a temporal discount-  
344 ing of reward, which appears key to human decision making and the theory of reinforcement learn-  
345 ing. Here we expressed it as a trade-off equivalency between energy and time. This was mainly  
346 due to the need for compatibility with our energetics model, but also because neither model nor  
347 experiment included an explicit reward to be discounted. We used a simple, linear valuation of  
348 time in terms of energy, rather than a nonlinear, exponential or hyperbolic temporal discounting  
349 factor (*Green and Myerson, 1996*). Energy is a physiological cost endemic to life, that is not ob-  
350 viously more or less valuable at different points in time. It is sufficient to predict and explain the  
351 present results, and there is currently insufficient evidence to favor a nonlinear cost over our linear  
352 valuation. But regardless of the particular formulation, it appears that a valuation of time may be a  
353 fairly consistent individualistic trait, generalizable to other tasks such as hand and eye movements  
354 (*Labaune et al., 2019*). Indeed, we have found a similar valuation of time to explain how reaching  
355 durations and speed trajectories vary with reaching distance (*Wong et al., 2021*). Another implica-  
356 tion of our model is that humans may incorporate prediction of time within central nervous system  
357 internal models. Such models have long been proposed to explain humans predict and adapt their  
358 movement trajectories, for example to novel dynamics (*Todorov, 2004*). If movement duration is  
359 also part of human planning, it suggests the ability to predict not only movement trajectories and  
360 energetics, but also time.

361 Valuation of time offers another perspective on minimizing the gross cost of transport. Actual  
362 walking tasks are not purely steady, and are probably planned with consideration of what hap-  
363 pens at the destination. *Long and Srinivasan (2013)* proposed a task to minimize the total energy  
364 expended to walk to destination within a more than ample allocation of time. They showed that  
365 total energy should be optimized by mixing resting and walking (and running if necessary). Sup-  
366 pose the task is extended to an indefinite duration, where a considerable amount of time is spent  
367 resting. The optimal total energy and walking duration may be found by applying our Energy-Time  
368 objective with time valuation ( $C_T$ ) equal to zero (Fig. 6). Walking faster than optimal would yield  
369 more time to rest, but at a greater total energy cost for walking. Walking slower would cost less  
370 energy for the walking motion alone, but at a greater total cost due to less time available to rest.  
371 After all,  $C_T$  is the energy one is willing to expend to save a unit of time, and the resting rate is the  
372 energy expended to rest for a unit of time. This may seem like a trivial restatement of the min-COT  
373 hypothesis, but it differs in two important ways. First, it can predict both the duration of walking  
374 and the entire speed trajectory, even for short bouts where there is no steady portion. Second, it  
375 considers how valuable time is at the destination. Minimizing the gross cost of transport is most  
376 sensible for maximizing the survivable range distance (*Srinivasan, 2009*), which may not be a con-  
377 cern in modern life where survival rates are high and calories plentiful. Rather, it may be a sensible  
378 default to value time at close to the resting rate, and to vary the valuation depending context. One  
379 may thus rush toward a long-lost friend or a hurry in a big city, because the time spent at destina-  
380 tion is far more valuable than resting. Similarly, we do not consider walking slowly to be a waste  
381 of energy per distance, but rather a waste of time. Even then, there are cases when humans might  
382 wish to waste time, for example to avoid an odious task, according to the expression “the slow  
383 march to the gallows.”

384 The consistency of individual walking trajectories may have practical implications. Although  
385 walking speed is used as a clinical indicator of mobility, it is difficult to standardize (*Middleton  
386 et al., 2015*), because evaluations may be confined to the length of the available walkway, which  
387 may be too short (e.g., less than 10 m) for a steady speed to be reached. But given the time to walk  
388 a fixed distance, it may be possible to predict the duration and steady speed for another distance,  
389 referenced from a universal family of walking trajectories. It is also possible that some clinical  
390 conditions might be manifested by a deviance from that family, perhaps in the acceleration or de-  
391 celeration phases, or in how the trajectories vary with distance. The methodology employed here

392 does not require specialized equipment beyond inertial measurement units, and the characteri-  
393 zation of speed trajectories can potentially provide more information than available from steady  
394 speed alone.

395 The Energy-Time hypothesis could be tested by further inquiries. We have thus far regarded the  
396 valuation of time as a relatively fixed parameter for each subject. That valuation is likely influenced,  
397 and therefore testable, by many contextual factors, including physiological and socio-psychological  
398 variables and task constraints. For example, caffeine intake, feeding status (e.g., *Taylor and Faisal,*  
399 *2018*), or monetary reward could be used to make time more valuable as a trade-off against energy.  
400 Conversely, energy may be helpful for assessing the valuation of time (or temporally discounted  
401 reward), which is not easy to measure other than indirectly. Walking has a well-characterized physi-  
402 ological energy cost, and could serve as a useful trade-off against time or reward. The hypothesized  
403 optimal gait is the point at which the costs of energy and time have equal and opposite slopes (i.e.,  
404 partial derivatives) with respect to an independent variable such as speed (e.g., Fig. 6C), carried  
405 load, or incline. There are thus a variety of opportunities to manipulate the energetic cost of walk-  
406 ing, as a means to assess the proposed valuation of time.

407 There are a number of limitations to this study. Although we tested model predictions in terms  
408 of speed trajectories, we did not measure mechanical work or metabolic energy expenditure in hu-  
409 man subjects, which would provide greater insight regarding the proposed trade-offs against time.  
410 We also did not evaluate each individual's metabolic cost of transport vs. speed, which would reveal  
411 more precise differences between the min-COT speed and the actual self-selected speed. Nor did  
412 we evaluate gait kinematics or kinetics, which may be helpful for detailing other ways that walking  
413 bouts vary with distance. The simple walking model also only includes a crude representation of  
414 step-to-step transitions, and not other factors such as forced leg motion (*Doke et al., 2005*), stabil-  
415 ity (*Bauby and Kuo, 2000; Donelan et al., 2004; Rebulu et al., 2017*), and three-dimensional motion  
416 (*Donelan et al., 2001*) that likely also affect energetic cost, and could therefore be used to test the  
417 valuation of time. We also did not include an explicit reward, which could facilitate assessment  
418 of energy and time in terms of other trade-offs such as money or food. In fact, the Energy-Time  
419 hypothesis should be regarded as a subset of the many factors that should govern human actions,  
420 rendered here in a simple but quantitative form.

## 421 Conclusion

422 Humans appear to select walking speed dynamically to minimize a combination of energy and  
423 time expenditure. This is both compatible with and extends the traditional hypothesis that hu-  
424 mans minimize gross energy expenditure per unit distance. We found it more general to minimize  
425 the total cost of a walking bout, due to the ability to predict an entire speed trajectory, with the  
426 optimal steady speed as an emergent property. By including a cost for time expenditure, we intro-  
427 duce a quantitative and operational means to make walking models compatible with the study of  
428 movement vigor. Tasks may also be broadened beyond walking, to include consideration of the  
429 reward to be gained or further energy to be expended once the destination is reached. Walking  
430 may thus be integrated into broader questions of how and why humans take the actions they do.  
431 As a modification to the traditional adage about money, we suggest that "Time is energy."

## 432 Methods

433 We experimentally tested how human walking speed varies with walking distance. The speed tra-  
434 jectories observed from human subjects were compared against predictions from the Energy-Time  
435 hypothesis and against the minimum-COT speed. To formulate the hypothesis and make quantita-  
436 tive predictions, we expressed it as an optimal control problem including both energy and time. We  
437 first state the hypothesis for human walking, and describe how it is adapted for a simple walking  
438 model to yield predicted speed trajectories. This is then followed by description of the experiment  
439 regarding human walking speed, and finally an analysis of steady speed as a property of the model.

440 **Walking model**

441 We use the “simplest walking model” (Kuo, 2002) to operationalize this optimization problem (Fig.  
 442 7A). The model treats the stance leg as an inverted pendulum and requires mechanical work to  
 443 power the gait. The body center of mass (COM) is modeled as a point mass supported by the  
 444 stance leg, so that each pendulum-like step follows an arc, which itself requires no energy input.  
 445 Work is performed during the step-to-step transition (Fig. 7B), to redirect the COM velocity from  
 446 forward-and-downward the end of one arc, and forward-and-upward at the beginning of the next.  
 447 This is accomplished most economically with an active, impulsive push-off along the axis of the  
 448 trailing leg, immediately followed by an impulsive, dissipative collision between the rigid leading  
 449 leg and ground. In steady gait, the optimal push-off restores the collision losses, with mutually  
 450 canceling impulses of equal magnitude. Speeding up is a matter of a greater push-off than colli-  
 451 sion, and a net increase in COM velocity during the step-to-step transition (Fig. 7C). Positive and  
 452 negative work are proportional to the square of the push-off and collision impulses, respectively  
 453 (Kuo, 2002), so that speeding up also dissipates less collision energy than steady gait. Slowing down  
 454 is the same in reverse, with collisions exceeding push-offs. This model predicts how step-to-step  
 455 transition work for steady walking should increase as a function of step length and step width  
 456 (Donelan et al., 2002). The model mainly predicts mechanical work for push-off, which appears  
 457 to be a proportional predictor of the majority of human metabolic energy during steady walking  
 458 (Donelan et al., 2002). That work also yields a mechanical cost of transport that varies curvilinearly  
 459 with steady speed, similar to the empirical metabolic curve (Fig. 1a; Ralston, 1958). There  
 460 are of course other contributions to the metabolic cost of walking such as to move the swing leg  
 461 (Kuo, 2001), but of smaller magnitude than step-to-step transitions, which are to be tested alone  
 462 for their predictive value. Details of this model have been described in greater detail previously  
 463 (Darici et al., 2020; Kuo, 2002), and are recounted only briefly here.

464 A walking bout consists of a sequence of  $N$  steps, starting and ending at rest. It may be de-  
 465 scribed by the discrete sequence of body speeds  $v_i$  ( $i = 1, 2, \dots, N$ ), each equal to the distance trav-  
 466 eled for step  $i$  divided by that step’s time duration  $\tau_i$ . The model begins at rest in an upright position  
 467 (Fig. 7D), and is set into motion by a forward initiation impulse acting on the pelvis. In humans, the  
 468 torso can serve as an inertia that the hip muscles can act against, but for simplicity this action is  
 469 represented as a translational impulse at the pelvis, summarized by the associated positive work  $u_0$ .  
 470 The total positive work performed by the model consists of the work from initiation and the succes-  
 471 sive push-offs, a sequence  $u_i$  ( $i = 0, 1, \dots, N$ ). There is also a corresponding sequence of dissipative  
 472 collision impulses by the leading leg, and a dissipative gait termination to end at upright.

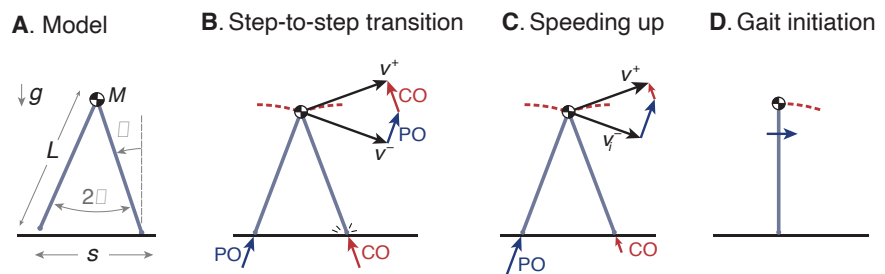

**Figure 7.** Simple optimization model of walking. (A.) Walking dynamics modeled as a point center-of-mass (COM, mass  $M$ ), supported by an inverted-pendulum stance leg (length  $L$ ). (B.) The inverted pendulum stance phase is punctuated by a step-to-step transition, modeled with an impulsive push-off (PO) from the trailing leg, followed by impulsive, inelastic collision (CO) with leading leg and ground. The COM velocity is  $v^-$  at end of stance, then is redirected by PO and CO to yield velocity  $v^+$  at end of step-to-step transition, beginning the next stance phase. (C.) For the model to speed up, the magnitude of PO must exceed that of CO, and  $v^+$  must have greater magnitude than  $v^-$ . (D.) The walking bout is initiated by a forward impulse applied at the pelvis, described by positive work  $u_0$ .

473 The step-to-step transition starts just before leading leg ground contact, and consists of

474 a perfectly impulsive push-off from the trailing leg, followed in immediate succession by a perfectly  
 475 inelastic and impulsive collision of the leading leg with ground. The COM velocity at the end of one  
 476 stance phase is  $v_i^-$ , directed forward and downward according to the pendulum arc. Mechanical  
 477 work is performed only during the step-to-step transition, with a succession of ideal impulses. First  
 478 is positive push-off work from the trailing leg, directed from its foot to the COM, and second is a  
 479 perfectly inelastic heel-strike collision of the leading leg with ground, directed from the leading foot  
 480 to the COM. For brevity, the equations presented here use dimensionless versions of quantities,  
 481 with body mass  $M$ , gravitational acceleration  $g$ , and leg length  $L$  as base units. The push-off work  
 482 is denoted  $u_i$  (in units of mass-normalized work), and the push-off and collision sequence act to  
 483 redirect the COM velocity to  $v_i^+$  at the beginning of the next stance phase, directed forward and up-  
 484 ward according to the next pendulum arc. Using impulse-momentum, the step-to-step transition  
 485 is described by

$$v_i^+ = v_i^- \cos 2\alpha + \sqrt{2u_i} \sin 2\alpha. \quad (3)$$

486 where  $2\alpha$  is the inter-leg angle (Figure 7A). There is no work performed during the passive, inverted  
 487 pendulum phases, and so the step-to-step transition is responsible for all energy inputs ( $u_i$ ) and  
 488 energy losses (from collisions).

489 The dynamics of an inverted pendulum describe all of the other motion in the system, consisting  
 490 of the falling of one inverted pendulum toward the step-to-step transition, and the rising of the next  
 491 inverted pendulum toward mid-stance. These dynamics determine the respective velocities and  
 492 timing of these respective instances. The velocities may be found through conservation of energy:

$$v_i^- = \sqrt{2(1 - \cos \alpha) + v_i^+{}^2} \quad (4)$$

$$v_{i+1} = \sqrt{(v_i^+)^2 + 2(\cos \alpha - 1)} \quad (5)$$

493  
 494  
 495 The step time  $\tau_i$  is defined as the time for the stance leg angle  $\theta$  to move between successive mid-  
 496 stance instants, and the corresponding velocities from  $v_i$  to  $v_{i+1}$ . It may be regarded as the sum of a  
 497 time  $\tau_i^-$  from mid-stance to the step-to-step transition, and then the time  $\tau_i^+$  from the step-to-step  
 498 transition until next mid-stance. Using the linearized dynamics, the dimensionless time  $\tau_i^-$  of step  
 499  $i$  is

$$\tau_i^- = \log \frac{\alpha + \sqrt{v_i^2 + \alpha^2}}{v_i}. \quad (6)$$

500 The other time  $\tau_i^+$  is

$$\tau_i^+ = \log \frac{\sqrt{v_i^+ + \alpha}}{\sqrt{v_i^+ - \alpha}} \quad (7)$$

501 For comparison with experiment, we also defined an average (as opposed to mid-stance) speed  
 502 for each step  $i$  as the step length divided by the step time between mid-stance instances,

$$\text{Body speed}_i = \frac{2L \sin \alpha}{\tau_i^- + \tau_i^+} \quad (8)$$

503 The trajectory of this body speed is plotted for different walking bouts, for both model and ex-  
 504 periment. The equations for body speed and step time are summarized as constraints  $f$  and  $g$   
 505 below.

506 We chose nominal parameters to correspond to typical human walking. A person with body  
 507 mass  $M$  70 kg and leg length  $L$  of 1 m may typically walk at  $1.25 \text{ m s}^{-1}$ , with step length of 0.68 m  
 508 and step time of 0.58 s, and corresponding fixed constant value  $\alpha = 0.35$ . Using dynamic similarity,  
 509 parameters and results are reported here either in SI units, or in normalized units with body mass  
 510  $M$ , gravitational acceleration  $g$ , and  $L$  as base units.

## 511 Optimal control formulation

512 We applied optimal control to the model for short walk bouts of varying distance (Fig. 7E). In hu-  
 513 mans, both positive and negative work appear to cost positive metabolic energy with different  
 514 proportionalities (*Margarita, 1976*). In the model, we assess a cost only for positive work, because  
 515 the net work of a level walking bout is zero. Minimizing positive work thus also implicitly minimizes  
 516 the negative work, as well as metabolic cost of any proportionality. The push-offs have a one-to-  
 517 one relationship with the speeds, and so either push-offs or speeds can describe the trajectory.  
 518 For the model, the goal is to minimize an objective function  $J_{\text{model}}$  comprising the total positive work  
 519 for the walking bout, plus the cost for the time duration:

$$J_{\text{model}} = (\text{Positive work}) + c_T(\text{Time duration}). \quad (9)$$

520 where the coefficient  $c_T$  is the model's valuation of time in terms of work, and equal to the mechan-  
 521 ical work the model is willing to spend to save a unit of time. It is treated as proportional to the  
 522 human's valuation  $C_T$  for metabolic energy per time.

523 This objective is applied as follows. The total distance  $D$  of a walking bout may be achieved  
 524 by taking an appropriate number of steps  $N$ . The walking trajectory is described by a discrete se-  
 525 quence of speeds  $v_i$  (step  $i = 1, 2, \dots, N$ ), starting and ending from standing at rest, given a standard  
 526 step length. The corresponding control actions include the initiation impulse and the push-off im-  
 527 pulses, for a total of  $N + 1$  actions  $u_i$  ( $i = 0, 1, 2, \dots, N$ ). Using these variables, the model's objective  
 528 is thus

$$J_{\text{model}} = \sum_{i=0}^N u_i + c_T \sum_{i=1}^N \tau_i \quad (10)$$

for the optimization problem

$$\text{minimize } J_{\text{model}}(v_i) \text{ subject to } \quad (11)$$

$$\text{rest constraints: } v_0 = 0, v_N = 0 \quad (12)$$

$$\text{walking dynamics: } v_{i+1} = f(v_i, u_i), \tau_{i+1} = g(v_i, u_i). \quad (13)$$

529 where the model begins and ends at rest, and walking dynamics constrain how the speed and  
 530 duration of the next step depend on the current step's speed and push-off (functions  $f$  and  $g$   
 531 detailed above). Note there are actually  $N + 1$  controls, consisting of the initiation input  $u_0$  and the  
 532  $N$  step-to-step transition push-offs ( $u_1, u_2, \dots, u_N$ ).

533 The time valuation  $c_T$  is treated as an unknown but constant coefficient. Greater  $c_T$  is expected  
 534 to yield faster walking bouts, with experimental data used to determine an appropriate range of  
 535 values. Within a fixed experimental context, we expect  $c_T$  to be constant. We found values of  $c_T$   
 536 ranging 0.006 to 0.06  $M g^{-1} .5 L^0 .5$  to yield speeds approximately similar to subjects.

537 We also considered an alternative hypothesis that walking occurs almost entirely at the optimal  
 538 steady speed. This was primarily to show how different trajectories require different amounts of  
 539 work. Termed the steady min-COT hypothesis, the goal is to walk at the min-COT speed  $v^*$ , or close  
 540 to it, as much as possible. This is accomplished by minimizing deviations from  $v^*$  throughout the  
 541 bout, with objective

$$J_{\text{steady}} = \sum_{i=1}^N (v_i - v^*)^2 \quad (14)$$

542 subject to the same constraints as the Energy-Time hypothesis. This objective is expected to cause  
 543 the model to accelerate immediately from rest to  $v^*$ , then remain at that steady speed, and then  
 544 finally decelerate immediately back to rest. As with any walking bout, the trajectory requires me-  
 545 chanical work, which may be compared against the work produced by the Energy-Time hypothesis.

546 Model predictions were produced using computational optimization. Optimal control was com-  
 547 puted using the JuMP optimization package for the Julia language (*Dunning et al., 2017*), formulated  
 548 as a discrete collocation problem, minimized by nonlinear programming (Ipopt). Step lengths were



549 examined with a nominal fixed step length of 0.68 m, and sensitivity analyses performed with fixed  
550 lengths of 0.59 m and 0.78 m, and varying lengths following the human preferred step length rela-  
551 tionship  $s = v^{0.42}$  (Grieve, 1968). Walking bouts were conducted for  $N$  ranging 1 to 20 steps. The  
552 resulting trajectories were condensed into a scalable, self-similar family of speed trajectories.

## 553 Experimental Methods

554 We tested the model predictions by experimentally measuring the speed profiles of healthy adults  
555 walking a series of short distances, ranging about 2 to 20 steps. Subjects ( $N = 10$ , 6 male and 4  
556 female, 24–38 yrs) were instructed to walk at a comfortable speed in ten distance conditions, start-  
557 ing from standing at one numbered marker on the ground, and ending at another as requested  
558 by the experimenter. After each trial, there was a brief waiting interval, to reduce interference be-  
559 tween successive trials and to avoid any incentive to rush through trials. The walking surface was  
560 a level sidewalk. The numbered markers were separated by distances of 1.1, 1.7, 2.2, 2.8, 3.3, 3.8,  
561 5.1, 7, 9.1, and 12.7 m. Subjects were provided with a simple task upon reaching the target: They  
562 were provided a pointer stick and instructed to walk to and touch the pointer to the target marker.  
563 This was intended to provide a context for the task, reflecting the fact that humans often walk to a  
564 particular destination to accomplish a task. Each distance condition was conducted a total of four  
565 times in two pairs of out-and-back trials, with the distances in random order. There were therefore  
566 a total of 400 trials, from ten subjects walking ten distances, each four times.

567 Walking speeds were measured from foot-mounted inertial measurement units (IMUs). These  
568 were used to compute the spatiotemporal trajectory of each foot in 3D, which was then processed  
569 to yield forward walking speed for the body per step. Each IMU (Opal sensors, APDM Inc., Port-  
570 land, Oregon) was placed on the top of each foot, taped to the outside of the shoe. The recorded  
571 data of linear acceleration and angular velocity data were integrated using a previously-described  
572 algorithm (Rebula *et al.*, 2013) to yield foot trajectories. Briefly, the algorithm detects footfalls as  
573 instances in time when the foot is momentarily at rest on the ground, as defined by thresholds for  
574 acceleration and angular velocity. The footfall instance was defined as the mid-point of the below-  
575 threshold interval, and used to correct the integrated foot velocity (from gravity-corrected inertial  
576 accelerations) to zero, thus reducing IMU integration drift. The footfalls were also used to segment  
577 data into discrete strides, from which speed and length of each stride was calculated. (Subjects  
578 also wore another IMU on a waist belt, the data from which was used to demarcate the trials, but  
579 not for any further quantitative analysis.)

580 There were a few other analysis adjustments required to produce forward walking data. The  
581 absolute position and compass heading of the IMUs were unknown, yielding independent foot tra-  
582 jectories with no relation to each other. However, the experimental conditions called for forward  
583 walking for a known distance, so we rotated each foot path to align them into a single forward di-  
584 rection. We also assumed that both feet travelled approximately the same distance for each walk,  
585 and translated and rescaled the start and end points to match each other, to yield a processed  
586 position-time graph of the two feet (see representative data in Fig. 8). We also devised a defini-  
587 tion for the starting and ending times for each trial based on IMU data. Humans initiate their gait  
588 by shifting their weight before moving the feet (Mann *et al.*, 1979), so that the footfall threshold  
589 defined above may not detect the actual gait initiation. We therefore defined a rough approxi-  
590 mation to gait initiation and termination, starting before and ending after threshold crossing, by  
591 an amount equal to half the average below-threshold time during walking. This adjustment may  
592 be incorrect compared to actual weight shift by several tens of milliseconds. The experiment is  
593 mainly concerned with speed profiles over time on the order of several seconds. The accuracy of  
594 the experiment can thus tolerate small errors in detecting gait initiation or termination.

595 Finally, the body's walking speed and length of each step were calculated as follows (Fig. 8).  
596 The trajectory of each foot's strides were found to cross each other, approximating the time in  
597 mid-stance when one foot passes by the other. These points of intersection were used to define  
598 step length as the spatial distance between intersections, and step time as the temporal difference

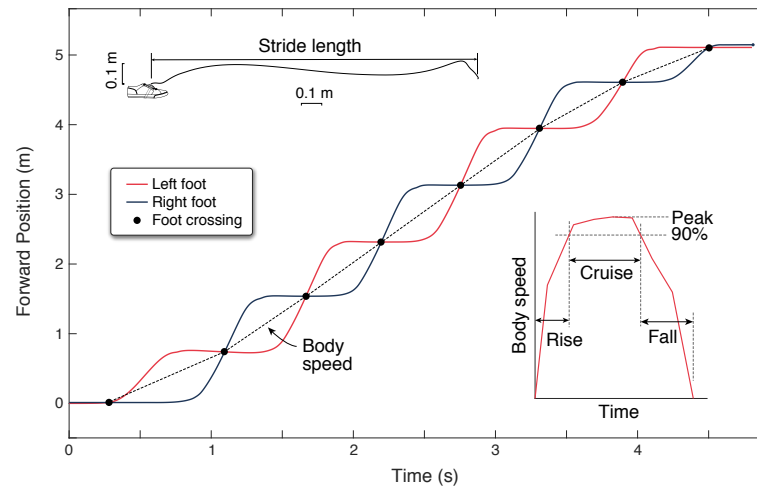

**Figure 8.** Experimental estimation of walking speed from inertial measurement units (IMUs). Forward position vs. time are shown for both feet (black and red lines) for a single walking bout of eight steps. Forward position is determined from foot trajectories, computed by integrating gravity-corrected inertial data (top inset). Each foot moves one stride length at a time, and the crossing points of the two feet define mid-stance instances that separate individual steps (black dots). Body speed is defined as the step length divided by step duration (slope of dotted line) for each step. Walking speed trajectories are plotted as discrete body speed vs. time. There are three durations defined within a walking bout (right inset): rise time, cruise time, and fall time. Rise and fall times are to accelerate from rest to 90% of peak speed and the converse. Cruise time is the time spent between 90% and peak speed.

599 between intersections. Assuming the body moves as much as the feet between such mid-stance  
600 instances, we defined walking speed (“body speed”) at each step as the length divided by time of  
601 the motion preceding each intersection. These discrete data were used to produce trajectories of  
602 speed for each step (Fig. 8, inset), without regard to continuous-time undulations in velocity for  
603 the body center of mass. For comparison with these data, similar discrete body speeds and times  
604 were computed from model predictions.

605 We used these data to test the model predictions. We examined how human speed profiles var-  
606 ied with bout distance, and exhibited more rounded peaks for shorter bouts and flatter ones for  
607 longer ones. We tested for self-similarity by scaling the profiles by speed and time and performing  
608 statistical tests regarding peak speeds and walking durations. We tested whether a saturating ex-  
609 ponential describes the increase in peak speed with bout distance ( $R^2$ ; test 95% confidence interval  
610 of parameters not including zero). Expecting a self-similar shape for the peak speed vs. distance  
611 relationship, we scaled the curves by peak speed and tested for a single exponential. We tested  
612 self-similarity in terms of a reduction of variability in peak speed (standard deviation across sub-  
613 jects) for each condition, comparing non-normalized to normalized peak speeds (rescaled to mean  
614 overall peak speed) with paired t-test. We examined the walking durations as a function of bout dis-  
615 tance, and also tested self-similarity by significant reduction in standard deviations across subjects,  
616 comparing non-normalized to normalized data (rescaled to mean longest duration) with paired t-  
617 test. We also described walking durations in terms of rise and fall times (between 10% and 90% of  
618 peak speed).

619 Prior to the experiment, subjects provided informed consent as approved by the University  
620 of Calgary Conjoint Health Research Ethics Board (REB21-1497). Pre-established exclusion criteria  
621 included significant health or other conditions that preclude ability to walk on uneven terrain or  
622 moderate hiking trails; no prospective participants were excluded. The experiment was performed  
623 once.

## 624 **Effect of valuation of time on steady walking speed**

625 We performed an additional analysis to consider how the hypothesized energetic value of time  
626 may affect human steady walking speeds (6. This requires a valuation of time in terms of human  
627 metabolic energy rather than the model's mechanical work, and a consideration of longer walking  
628 bouts where steady walking dominates. To empirically quantify human cost as a function of speed,  
629 we fitted the model's steady mechanical work rate to human net metabolic power reported by  
630 *Eftman (1966)*, with a resting power adjusted to agree with the optimal steady speed of  $1.25\text{m s}^{-1}$   
631 reported by *Ralston (1958)*. The model was of the form

$$\dot{E}(v) = a \left( \frac{v+b}{\sqrt{gL}} \right)^n + d \quad (15)$$

632 where  $a$ ,  $b$  and  $d$  are empirical coefficients, and  $n$  is a model constraint. The exponent  $n$  is not  
633 critical, and values ranging 2 to 4 are sufficient to describe the increase. However, we used a value  
634 of  $n = 3.42$  as predicted by the simple model for human-like walking (*Kuo, 2002*). For metabolic  
635 power in  $\text{W kg}^{-1}$ , the empirical coefficients are  $a = 4.90\text{W kg}^{-1}$ ,  $b = 1.16\text{m s}^{-1}$ , and  $d = 1.56\text{W kg}^{-1}$   
636 ( $R^2 = 0.99$ ). The y-intercept may be regarded as a resting rate, at  $1.73\text{W kg}^{-1}$  (Fig. 6A). The resulting  
637 cost is therefore proportional to the model's mechanical work, while matching well with human  
638 metabolic power and optimal steady speed data. The curve may be expressed as cost of transport  
639 by dividing power by speed,  $\dot{E}/v$ .

640 We then used our own walking data to estimate the human valuation of time. We used the peak  
641 walking speeds from the longest walking bout as indicator of steady speed. These were compared  
642 to the steady speed predicted by the metabolic cost curve with an added variable, the metabolic  
643 valuation of time  $C_T$ . The Energy-Time curve was converted to cost of transport, and then mini-  
644 mized to yield optimal speed. This is equivalent to taking the limit of the Energy-Time objective as  
645 function of increasing distance, thus making the costs of starting and ending a walking bout small.  
646 The result predicts that steady speed will increase approximately with the cube root of  $C_T$  (Fig. 6B).  
647 This curve was thus used to estimate  $C_T$  for experimentally observed range of steady speeds. It  
648 was also used to estimate the effective cost of transport, including the valuation of time, as a func-  
649 tion of speed (Fig. 6C). This cost of transport may further be regarded as the sum of separate costs  
650 for Walking and Time (Fig. 6C), where Walking prefers to the cost of transport due to push-off work  
651 alone, and Time refers to the cost of transport due to the  $C_T$  term alone.

## 652 **Competing interests**

653 The authors declare no competing interests.

## 654 **Data availability**

655 Data and code for this study are in a publicly-accessible archive [DOI to be included here upon  
656 acceptance for publication].

## 657 **References**

- 658 **Afilalo J**, Eisenberg MJ, Morin JF, Bergman H, Monette J, Noiseux N, Nicolas, Alexander Karen P, Langlois Yves,  
659 Dendukuri Nandini, Chamoun Patrick, Kasparian Georges, Robichaud Sophie, Gharacholou S Michael, Boivin  
660 Jean-François. Gait Speed as an Incremental Predictor of Mortality and Major Morbidity in Elderly Patients  
661 Undergoing Cardiac Surgery. *Journal of the American College of Cardiology*. 2010 Nov; 56(20):1668–1676.  
662 doi: [10.1016/j.jacc.2010.06.039](https://doi.org/10.1016/j.jacc.2010.06.039).
- 663 **Atzler E**, Herbst R. Arbeitsphysiologische Studien. *Pflüg Arch ges Physiol*. 1927; 215:291–328.
- 664 **Bauby CE**, Kuo AD. Active Control of Lateral Balance in Human Walking. *J Biomech*. 2000 Nov; 33(11):1433–  
665 1440.
- 666 **Bornstein MH**. The pace of life: Revisited. *International Journal of Psychology*. 1979; 14(1-4):83–90. doi:  
667 [10.1080/00207597908246715](https://doi.org/10.1080/00207597908246715).

- 668 **Bornstein MH**, Bornstein HG. The Pace of Life. *Nature*. 1976 Feb; 259(5544):557–559. doi: 10.1038/259557a0.
- 669 **Browning RC**, Baker EA, Herron JA, Kram R. Effects of Obesity and Sex on the Energetic Cost and Preferred Speed of Walking. *Journal of Applied Physiology*. 2006 Feb; 100(2):390–398. doi: 10.1152/jappphysiol.00767.2005.
- 670  
671
- 672 **Browning RC**, Kram R. Energetic Cost and Preferred Speed of Walking in Obese vs. Normal Weight Women. *Obesity Research*. 2005; 13(5):891–899. doi: 10.1038/oby.2005.103.
- 673
- 674 **Darici O**, Temeltas H, Kuo AD. Anticipatory Control of Momentum for Bipedal Walking on Uneven Terrain. *Sci Rep*. 2020 Jan; 10(1):540. doi: 10.1038/s41598-019-57156-6.
- 675
- 676 **Doke J**, Donelan JM, Kuo AD. Mechanics and Energetics of Swinging the Human Leg. *J Exp Biol*. 2005 Feb; 208(Pt 3):439–445. doi: 10.1242/jeb.01408.
- 677
- 678 **Donelan JM**, Kram R, Kuo AD. Mechanical and Metabolic Determinants of the Preferred Step Width in Human Walking. *Proc Biol Sci*. 2001 Oct; 268(1480):1985–1992. doi: 10.1098/rspb.2001.1761.
- 679
- 680 **Donelan JM**, Kram R, Kuo AD. Mechanical Work for Step-to-Step Transitions Is a Major Determinant of the Metabolic Cost of Human Walking. *J Exp Biol*. 2002 Dec; 205(Pt 23):3717–3727.
- 681
- 682 **Donelan JM**, Shipman DW, Kram R, Kuo AD. Mechanical and Metabolic Requirements for Active Lateral Stabilization in Human Walking. *J Biomech*. 2004 Jun; 37(6):827–835. doi: 10.1016/j.jbiomech.2003.06.002.
- 683
- 684 **Dunning I**, Huchette J, Lubin M. JuMP: A Modeling Language for Mathematical Optimization. *SIAM Review*. 2017; 59(2):295–320. doi: 10.1137/15M1020575.
- 685
- 686 **Elftman H**. Biomechanics of Muscle. *J Bone Joint Surg*. 1966; 48-A:363–377.
- 687 **Entin PL**, Gest C, Trancik S, Richard Coast J. Fuel Oxidation in Relation to Walking Speed: Influence of Gradient and External Load. *Eur J Appl Physiol*. 2010 Oct; 110(3):515–521. doi: 10.1007/s00421-010-1523-6.
- 688
- 689 **Green L**, Myerson J. Exponential versus Hyperbolic Discounting of Delayed Outcomes: Risk and Waiting Time. *American Zoologist*. 1996 Sep; 36(4):496–505. doi: 10.1093/icb/36.4.496.
- 690
- 691 **Grieve DW**. Gait Patterns and the Speed of Walking. *Bio-med Engng*. 1968; 3:119–122.
- 692 **Hoyt DF**, Taylor CR. Gait and the Energetics of Locomotion in Horses. *Nature*. 1981 Jul; 292(5820):239–240. doi: 10.1038/292239a0.
- 693
- 694 **Jetté M**, Sidney K, Blümchen G. Metabolic Equivalents (METS) in Exercise Testing, Exercise Prescription, and Evaluation of Functional Capacity. *Clin Cardiol*. 1990 Aug; 13(8):555–565. doi: 10.1002/clc.4960130809.
- 695
- 696 **Kuo AD**. A Simple Model of Bipedal Walking Predicts the Preferred Speed-Step Length Relationship. *J Biomech Eng*. 2001 Jun; 123(3):264–269.
- 697
- 698 **Kuo AD**. Energetics of Actively Powered Locomotion Using the Simplest Walking Model. *J Biomech Eng*. 2002 Feb; 124(1):113–120.
- 699
- 700 **Kuo AD**, Donelan JM, Ruina A. Energetic Consequences of Walking like an Inverted Pendulum: Step-to-Step Transitions. *Exerc Sport Sci Rev*. 2005 Apr; 33(2):88–97.
- 701
- 702 **Labaune O**, Deroche T, Teulier C, Berret B. Vigor of Reaching, Walking, and Gazing Movements: On the Consistency of Interindividual Differences. *Journal of Neurophysiology*. 2019 Nov; 123(1):234–242. doi: 10.1152/jn.00344.2019.
- 703  
704
- 705 **Levine RV**, Bartlett K. Pace of Life, Punctuality, and Coronary Heart Disease in Six Countries. *Journal of Cross-Cultural Psychology*. 1984 Jun; 15(2):233–255. doi: 10.1177/0022002184015002009.
- 706
- 707 **Li H**, Cao Y. Moving at the Speed of Life: How Life Pace Influences Temporal Reasoning. *Metaphor and Symbol*. 2019 Jul; 34(3):158–166. doi: 10.1080/10926488.2019.1649839.
- 708
- 709 **Long LL**, Srinivasan M. Walking, Running, and Resting under Time, Distance, and Average Speed Constraints: Optimality of Walk–Run–Rest Mixtures. *Journal of The Royal Society Interface*. 2013 Apr; 10(81):20120980. doi: 10.1098/rsif.2012.0980.
- 710  
711
- 712 **Mann RA**, Hagy JL, White V, Liddell D. The Initiation of Gait. *J Bone Joint Surg Am*. 1979 Mar; 61(2):232–239.

- 713 **Margaria R.** Biomechanics and Energetics of Muscular Exercise. Oxford, London; 1976.
- 714 **Martin PE,** Rothstein DE, Larish DD. Effects of Age and Physical Activity Status on the Speed-Aerobic  
715 Demand Relationship of Walking. *Journal of Applied Physiology*. 1992 Jul; 73(1):200–206. doi:  
716 [10.1152/jappl.1992.73.1.200](https://doi.org/10.1152/jappl.1992.73.1.200).
- 717 **Middleton A,** Fritz SL, Lusardi M. Walking Speed: The Functional Vital Sign. *Journal of Aging and Physical Activity*.  
718 2015 Apr; 23(2):314–322. doi: [10.1123/japa.2013-0236](https://doi.org/10.1123/japa.2013-0236).
- 719 **Orendurff MS,** Schoen JA, Bernatz GC, Segal AD, Klute GK. How Humans Walk: Bout Duration, Steps per Bout,  
720 and Rest Duration. *J Rehabil Res Dev*. 2008; 45(7):1077–89.
- 721 **Ralston HJ.** Energy-Speed Relation and Optimal Speed during Level Walking. *Int Z Angew Physiol Einschl*  
722 *Arbeitsphysiol*. 1958 Oct; 17(4):277–283. doi: [10.1007/BF00698754](https://doi.org/10.1007/BF00698754).
- 723 **Ralston HJ.** Energetics of Human Walking. In: Herman RM, Grillner S, Stein PSG, Stuart DG, editors. *Neural Con-*  
724 *trol of Locomotion* Advances in Behavioral Biology, Boston, MA: Springer US; 1976.p. 77–98. doi: [10.1007/978-](https://doi.org/10.1007/978-1-4757-0964-3_5)  
725 [1-4757-0964-3\\_5](https://doi.org/10.1007/978-1-4757-0964-3_5).
- 726 **Rebula JR,** Ojeda LV, Adamczyk PG, Kuo AD. Measurement of Foot Placement and Its Variability with Inertial  
727 Sensors. *Gait & Posture*. 2013 Sep; 38(4):974–980. doi: [10.1016/j.gaitpost.2013.05.012](https://doi.org/10.1016/j.gaitpost.2013.05.012).
- 728 **Rebula JR,** Ojeda LV, Adamczyk PG, Kuo AD. The Stabilizing Properties of Foot Yaw in Human Walking. *J Biomech*.  
729 2017 Feb; 53:1–8. doi: [10.1016/j.jbiomech.2016.11.059](https://doi.org/10.1016/j.jbiomech.2016.11.059).
- 730 **Rose J,** Morgan DW, Gamble JG. Energetics of Walking, Ch. 5. In: Rose J, Gamble JG, editors. *Human Walking*,  
731 3rd edition ed. Philadelphia: Lippincott Williams & Wilkins; 2006.p. 77–102.
- 732 **Seethapathi N,** Srinivasan M. The Metabolic Cost of Changing Walking Speeds Is Significant, Implies Lower  
733 Optimal Speeds for Shorter Distances, and Increases Daily Energy Estimates. *Biology Letters*. 2015 Sep;  
734 11(9):20150486. doi: [10.1098/rsbl.2015.0486](https://doi.org/10.1098/rsbl.2015.0486).
- 735 **Shadmehr R,** de Xivry JJO, Xu-Wilson M, Shih TY. Temporal Discounting of Reward and the Cost of Time in  
736 Motor Control. *J Neurosci*. 2010 Aug; 30(31):10507–10516. doi: [10.1523/JNEUROSCI.1343-10.2010](https://doi.org/10.1523/JNEUROSCI.1343-10.2010).
- 737 **Srinivasan M.** Optimal Speeds for Walking and Running, and Walking on a Moving Walkway. *Chaos*. 2009 Jun;  
738 19(2):026112. doi: [10.1063/1.3141428](https://doi.org/10.1063/1.3141428).
- 739 **Srinivasan M,** Ruina A. Computer Optimization of a Minimal Biped Model Discovers Walking and Running.  
740 *Nature*. 2006; 439(7072):72–75.
- 741 **Studenski S,** Perera S, Patel K, Rosano C, Faulkner K, Inzitari M, Brach J, Chandler J, Cawthon P, Connor EB,  
742 Nevitt M, Visser M, Kritchevsky S, Badinelli S, Harris T, Newman AB, Cauley J, Ferrucci L, Guralnik J. Gait Speed  
743 and Survival in Older Adults. *JAMA*. 2011 Jan; 305(1):50–58. doi: [10.1001/jama.2010.1923](https://doi.org/10.1001/jama.2010.1923).
- 744 **Summerside EM,** Kram R, Ahmed AA. Contributions of Metabolic and Temporal Costs to Human Gait Selection.  
745 *Journal of The Royal Society Interface*. 2018 Jun; 15(143):20180197. doi: [10.1098/rsif.2018.0197](https://doi.org/10.1098/rsif.2018.0197).
- 746 **Sutton RS,** Barto AG. Reinforcement Learning, Second Edition: An Introduction. MIT Press; 2018.
- 747 **Taylor SV,** Faisal AA. Does Internal Metabolic State Determine Our Motor Coordination Strategy? *bioRxiv*. 2018  
748 May; doi: [10.1101/312454](https://doi.org/10.1101/312454).
- 749 **Todorov E.** Optimality Principles in Sensorimotor Control. *Nature neuroscience*. 2004; 7(9):907–915.
- 750 **Willis WT,** Ganley KJ, Herman RM. Fuel Oxidation during Human Walking. *Metabolism*. 2005 Jun; 54(6):793–799.  
751 doi: [10.1016/j.metabol.2005.01.024](https://doi.org/10.1016/j.metabol.2005.01.024).
- 752 **Wong JD,** Cluff T, Kuo AD. The Energetic Basis for Smooth Human Arm Movements. *eLife*. 2021 Dec; 10:e68013.  
753 doi: [10.7554/eLife.68013](https://doi.org/10.7554/eLife.68013).
